# Supplementary material
Source: PubMed Central journal article supplement (PMC6584312)
Supplement: jamasurg-153-881-s001.pdf [file jamasurg-153-881-s001.pdf]

## Supplementary Online Content

Williams SB, Shan Y, Jazzar U, et al. Comparing survival outcomes and costs associated with radical cystectomy and trimodal therapy for older adults with muscle-invasive bladder cancer. *JAMA Surg*. Published online June 27, 2018. doi:10.1001/jamasurg.2018.1680

**eTable 1.** Proportional Hazards Regression Model of Predictors for Time-to-Death According to Clinical Stage

**eTable 2.** Proportional Hazards Regression Model of Predictors for Time-to-Death According to Use of Chemotherapy Type in Trimodal Therapy

**eTable 3.** Proportional Hazards Regression Model of Predictors for Time-to-Death According to Fractions Delivered (<18 v >18) in Trimodal Therapy Cohort

**eTable 4.** Proportional Hazards Regression Model of Predictors for Time-to-Death on Use of Neoadjuvant Chemotherapy Among Radical Cystectomy Cohort

This supplementary material has been provided by the authors to give readers additional information about their work.

**eTable 1.** Proportional Hazards Regression Model of Predictors for Time-to-Death According to Clinical Stage

| <b>Stage 2</b>     |                                  |               |      |                |
|--------------------|----------------------------------|---------------|------|----------------|
| <b>Covariate</b>   | <b>Cox Regression</b>            |               |      |                |
|                    | <b>Overall Survival</b>          |               |      |                |
|                    | <b>HR</b>                        | <b>95% CI</b> |      | <b>p Value</b> |
| <b>Treatment</b>   |                                  |               |      |                |
| Radical Cystectomy | ref                              | -             | -    | -              |
| Trimodal Therapy   | 1.62                             | 1.38          | 1.89 | <0.001         |
|                    |                                  |               |      |                |
| <b>Covariate</b>   | <b>Competing Risk Regression</b> |               |      |                |
|                    | <b>Cancer-Specific Survival</b>  |               |      |                |
|                    | <b>HR</b>                        | <b>95% CI</b> |      | <b>p Value</b> |
| <b>Treatment</b>   |                                  |               |      |                |
| Radical Cystectomy | ref                              | -             | -    | -              |
| Trimodal Therapy   | 1.76                             | 1.42          | 2.18 | <0.001         |
|                    |                                  |               |      |                |
| <b>Stage 3</b>     |                                  |               |      |                |
| <b>Covariate</b>   | <b>Cox Regression</b>            |               |      |                |
|                    | <b>Overall Survival</b>          |               |      |                |
|                    | <b>HR</b>                        | <b>95% CI</b> |      | <b>p Value</b> |
| <b>Treatment</b>   |                                  |               |      |                |
| Radical Cystectomy | ref                              | -             | -    | -              |
| Trimodal Therapy   | 1.74                             | 1.26          | 2.40 | <0.001         |
|                    |                                  |               |      |                |
| <b>Covariate</b>   | <b>Competing Risk Regression</b> |               |      |                |
|                    | <b>Cancer-Specific Survival</b>  |               |      |                |
|                    | <b>HR</b>                        | <b>95% CI</b> |      | <b>p Value</b> |
| <b>Treatment</b>   |                                  |               |      |                |
| Radical Cystectomy | ref                              | -             | -    | -              |
| Trimodal Therapy   | 1.40                             | 0.90          | 2.19 | 0.138          |
|                    |                                  |               |      |                |
| <b>Stage 4</b>     |                                  |               |      |                |
| <b>Covariate</b>   | <b>Cox Regression</b>            |               |      |                |
|                    | <b>Overall Survival</b>          |               |      |                |
|                    | <b>HR</b>                        | <b>95% CI</b> |      | <b>p Value</b> |
| <b>Treatment</b>   |                                  |               |      |                |
| Radical Cystectomy | ref                              | -             | -    | -              |
| Trimodal Therapy   | 0.94                             | 0.72          | 1.23 | 0.663          |
|                    |                                  |               |      |                |
| <b>Covariate</b>   | <b>Competing Risk Regression</b> |               |      |                |
|                    | <b>Cancer-Specific Survival</b>  |               |      |                |
|                    | <b>HR</b>                        | <b>95% CI</b> |      | <b>p Value</b> |
| <b>Treatment</b>   |                                  |               |      |                |
| Radical Cystectomy | ref                              | -             | -    | -              |
| Trimodal Therapy   | 1.16                             | 0.84          | 1.58 | 0.367          |

CI: Confidence interval; HR: Hazard ratio

**eTable 2.** Proportional Hazards Regression Model of Predictors for Time-to-Death According to Use of Chemotherapy Type in Trimodal Therapy

| Covariate                                           | Cox Regression            |        |      |         |
|-----------------------------------------------------|---------------------------|--------|------|---------|
|                                                     | Overall Survival          |        |      |         |
|                                                     | HR                        | 95% CI |      | p Value |
| <b>Treatment</b>                                    |                           |        |      |         |
| <b>Radical Cystectomy</b>                           | ref                       | -      | -    | -       |
| <b>Trimodal Therapy + Cisplatin or 5-FU and MMC</b> | 1.27                      | 1.10   | 1.47 | 0.001   |
| <b>Trimodal Therapy + Other Chemotherapy</b>        | 1.69                      | 1.46   | 1.96 | <0.001  |
|                                                     |                           |        |      |         |
| Covariate                                           | Competing Risk Regression |        |      |         |
|                                                     | Cancer-Specific Survival  |        |      |         |
|                                                     | HR                        | 95% CI |      | p Value |
| <b>Treatment</b>                                    |                           |        |      |         |
| <b>Radical Cystectomy</b>                           | ref                       | -      | -    | -       |
| <b>Trimodal Therapy + Cisplatin or 5-FU and MMC</b> | 1.50                      | 1.23   | 1.83 | <0.001  |
| <b>Trimodal Therapy + Other Chemotherapy</b>        | 1.97                      | 1.62   | 2.39 | <0.001  |

5-FU: 5- fluorouracil; CI: Confidence interval; HR: Hazard ratio; MMC: mitomycin C

**eTable 3.** Proportional Hazards Regression Model of Predictors for Time-to-Death According to Fractions Delivered (<18 v >18) in Trimodal Therapy Cohort

| Covariate                                | Cox Regression            |        |      |         |
|------------------------------------------|---------------------------|--------|------|---------|
|                                          | Overall Survival          |        |      |         |
|                                          | HR                        | 95% CI |      | p Value |
| <b>Treatment</b>                         |                           |        |      |         |
| <b>Radical Cystectomy</b>                | ref                       | -      | -    | -       |
| <b>Trimodal Therapy &lt;18 fractions</b> | 1.39                      | 1.16   | 1.68 | <0.001  |
| <b>Trimodal Therapy &gt;18 fractions</b> | 1.23                      | 1.02   | 1.48 | 0.029   |
|                                          |                           |        |      |         |
| Covariate                                | Competing Risk Regression |        |      |         |
|                                          | Cancer-Specific Survival  |        |      |         |
|                                          | HR                        | 95% CI |      | p Value |
| <b>Treatment</b>                         |                           |        |      |         |
| <b>Radical Cystectomy</b>                | ref                       | -      | -    | -       |
| <b>Trimodal Therapy &lt;18 fractions</b> | 1.48                      | 1.14   | 1.93 | 0.003   |
| <b>Trimodal Therapy &gt;18 fractions</b> | 1.37                      | 1.05   | 1.78 | 0.019   |

CI: Confidence interval; HR: Hazard ratio

\* N=326, Median: 18 fractions. We counted number of fractions within 90 days after the first radiation treatment and defined number of fractions based on the number of radiation treatments delivered as billed in Medicare claims as part of the initial outpatient course of radiotherapy<sup>16</sup>.

**eTable 4.** Proportional Hazards Regression Model of Predictors for Time-to-Death on Use of Neoadjuvant Chemotherapy Among Radical Cystectomy Cohort

| Covariate                                            | Cox Regression            |        |      |         |
|------------------------------------------------------|---------------------------|--------|------|---------|
|                                                      | Overall Survival          |        |      |         |
|                                                      | HR                        | 95% CI |      | p Value |
| <b>Treatment</b>                                     |                           |        |      |         |
| <b>Trimodal Therapy</b>                              | ref                       | -      | -    | -       |
| <b>Radical Cystectomy + Neoadjuvant Chemotherapy</b> | 0.62                      | 0.48   | 0.79 | <0.001  |
| <b>Radical Cystectomy Alone</b>                      | 0.70                      | 0.61   | 0.79 | <0.001  |
|                                                      |                           |        |      |         |
| Covariate                                            | Competing Risk Regression |        |      |         |
|                                                      | Cancer-Specific Survival  |        |      |         |
|                                                      | HR                        | 95% CI |      | p Value |
| <b>Treatment</b>                                     |                           |        |      |         |
| <b>Trimodal Therapy</b>                              | ref                       | -      | -    | -       |
| <b>Radical Cystectomy + Neoadjuvant Chemotherapy</b> | 0.53                      | 0.37   | 0.76 | <0.001  |
| <b>Radical Cystectomy Alone</b>                      | 0.59                      | 0.49   | 0.71 | <0.001  |

CI: Confidence interval; HR: Hazard ratio
